# Supplementary material for: A self-powered strain senor based on a ZnO/PEDOT:PSS hybrid structure
Source: Royal Society of Chemistry journal article supplement (doi:10.1039/c3ra42778a), 2013-01-01
Supplement: c3ra42778a.pdf [file c3ra42778a.pdf]

## Electronic Supplementary Information

# A novel self-powered strain sensor based on ZnO /PEDOT:PSS hybrid structure

*Zengze Wang<sup>a</sup>, Junjie Qi<sup>a</sup>, XiaoQin Yan<sup>a</sup>, Qi Zhang<sup>a</sup>, Qinyu Wang<sup>a</sup>, Shengnan Lu<sup>a</sup>, Pei Lin<sup>a</sup>,  
Qingliang Liao<sup>a</sup>, zheng zhang<sup>a</sup> and Yue Zhang<sup>a,b,\*</sup>*

<sup>a</sup> State Key Laboratory for Advanced Metals and Materials, School of Materials Science and Engineering, University of Science and Technology Beijing, Beijing 100083, People's Republic of China.

<sup>b</sup> Key Laboratory of New Energy Materials and Technologies, University of Science and Technology Beijing, Beijing 100083, People's Republic of China.

\*Address correspondence to [yuezhang@ustb.edu.cn](mailto:yuezhang@ustb.edu.cn)

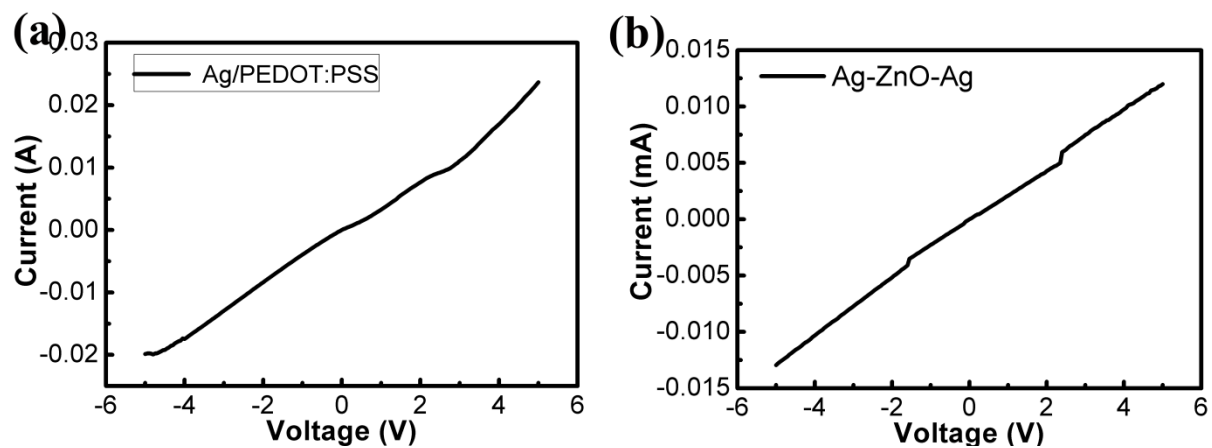

FIG. S1. (a) I-V characteristic between Ag and PEDOT:PSS, (b) I-V characteristic of Ag-ZnO-Ag structure.

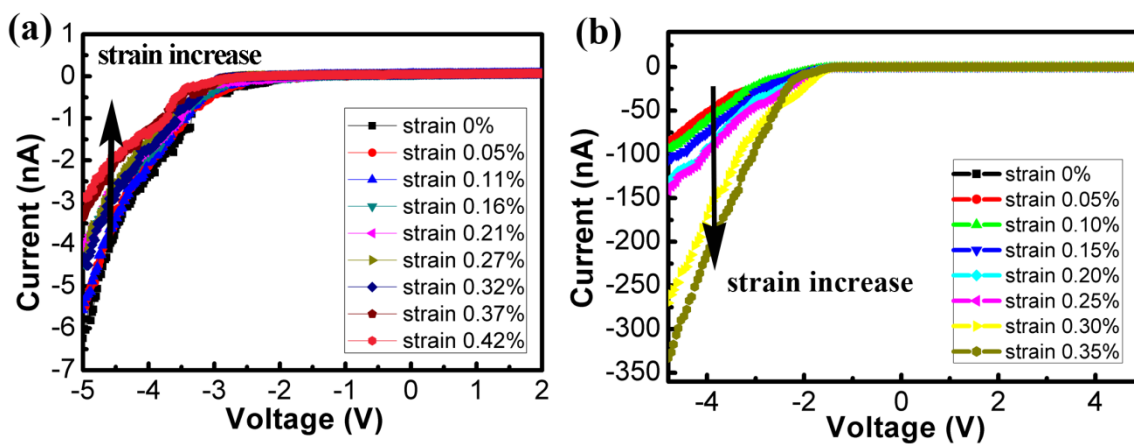

FIG. S2. I-V characteristics of other two devices under stretched strain when the direction of ZnO wire is opposite.

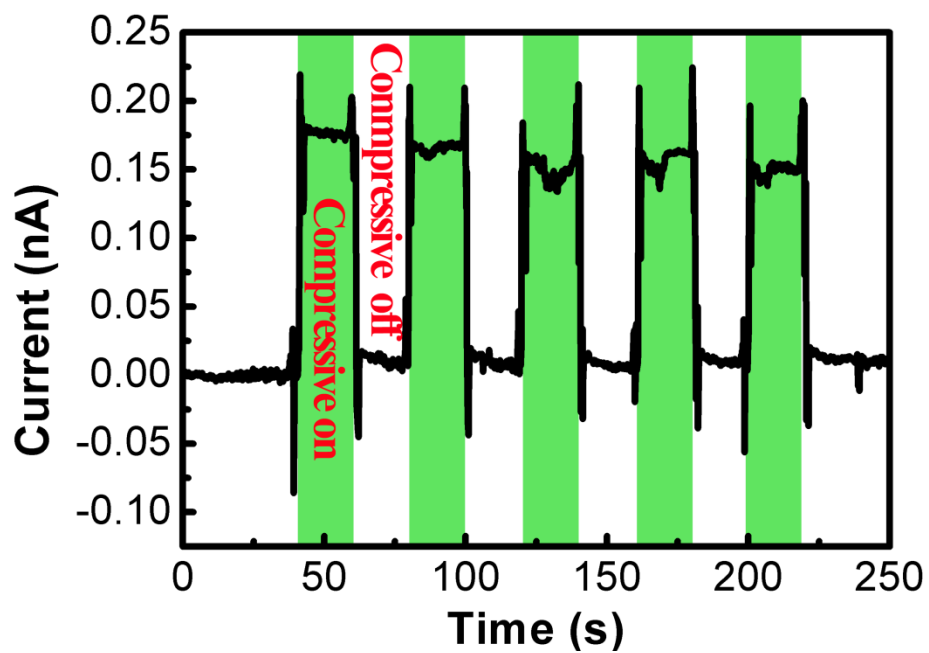

FIG. S3. Current responses of the device under repeated compressive strains and solar light without bias.

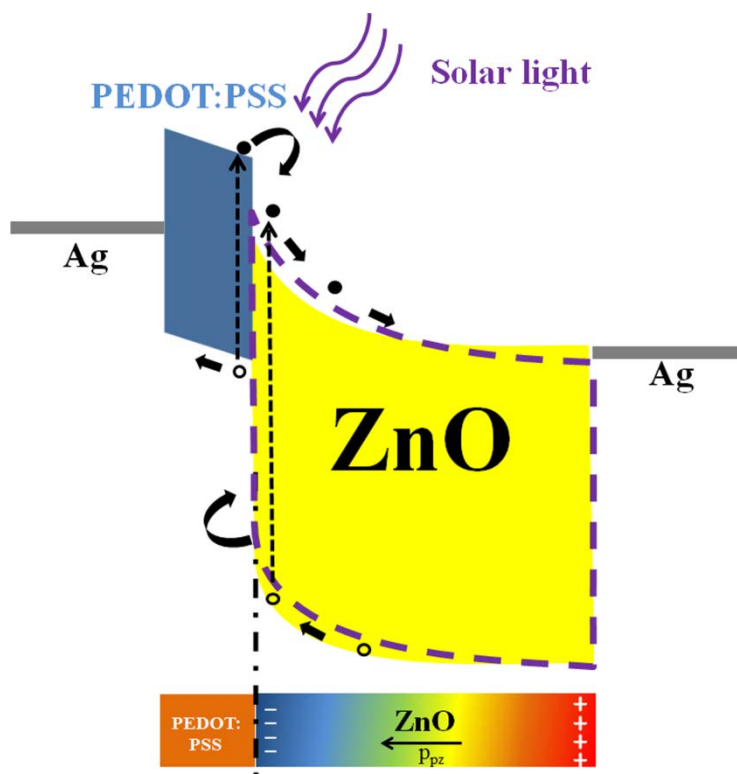

FIG. S4. Energy band diagram of the hybrid structure under solar light. The purple dish lines represent the modified energy band diagram of ZnO under compressed strain.
